# Supplementary material
Source: PubMed Central journal article supplement (PMC7315374)
Supplement: NIHMS1067632-supplement-Supplemental_material.pdf [file NIHMS1067632-supplement-Supplemental_material.pdf]

## SUPPLEMENTAL MATERIAL

Table S1. Primer sequences and PCR conditions for SNP and microsatellites genotyping.

| Variants   | F/R     | Primer Sequence (5' to 3')        | PCR conditions           |
|------------|---------|-----------------------------------|--------------------------|
| rs9910355  | F       | ATCACGCCACTGTACTCCAGC             | 45s,30s,45s (95,60,72) × |
| rs9910355  | R       | GAACACACTGGAAATACAACAGAAGC        | 30                       |
| rs9910355  | PEF     | GCAGTGAGCCGAGATTGTGC              |                          |
| rs9910355  | PER     | TCTGTCACTTAGGCTAAAGTGCAGC         |                          |
| rs9303504  | F       | ATCACGCCACTGTACTCCAGC             | 45s,30s,45s (95,60,72) × |
| rs9303504  | R       | GAACACACTGGAAATACAACAGAAGC        | 30                       |
| rs9303504  | PEF     | GCTCTGGGCTTTTTTGTTTAATTTTCT       |                          |
| rs9303504  | PER     | GCATTAGCAATATACTTCAATTGTCATATTACT |                          |
| rs9909004  | F       | CAAAGTCAGTCATCAGAGAACAGAGCGATC    | 30s,30s,30s (95,60,72) × |
| rs9909004  | R       | GGTCACATTTTGAGAGGCTGTTTC          | 30                       |
| rs9909004  | PEF     | GGGGCAGTGGAGCTGAAACAGTGTTAT       |                          |
| rs9909004  | PER     | CCCTTTTCCAGTACTGAAAGCAGTG         |                          |
| rs12601850 | F       | ACTTTGTATTCAAGTGGCTTTTCTTCC       | 30s,30s,30s (95,60,72) × |
| rs12601850 | R       | ACTTTGTTCTCGATGACAACTGGTATTC      | 30                       |
| rs12601850 | PEF     | GGACTCACTGCAACTAATTTTAGGCC        |                          |
| rs12601850 | PER     | CTAAACAAAACAAACCCTTACTAGAATGAAATA |                          |
| rs17633437 | F       | GATGCCGTTTGGCAGTTTCTAG            | 30s,30s,30s (95,60,72) × |
| rs17633437 | R       | GACTGTATATTCAAACCTTGTTGGCTACAA    | 30                       |
| rs17633437 | PEF     | TTTCATTTGGTCTTCAGGAACAAAATA       |                          |
| rs17633437 | PER     | GTTTATGGTTAAAATTGTAAAAGGAAGTTGC   |                          |
| rs7210446  | F       | AACCATGACCAACAGGAGCC              | 45s,30s,45s (95,60,72) × |
| rs7210446  | R       | TCCAAAGTGCTGGGATGACA              | 30                       |
| rs7210446  | PEF     | GAGATAGGAGACTGAGGTACAAGTTGG       |                          |
| rs7210446  | PER     | CTGGCCTACCTCATGATTCCA             |                          |
| rs2227857  | F- cDNA | AGAAATCTGGGACTGGGATCG             | 30s,30s,20s (95,59,72) × |
| rs2227857  | R- cDNA | TTCCATGTTTCCTTCCTCGTC             | 30                       |

|            |         |                             |                           |
|------------|---------|-----------------------------|---------------------------|
| rs2227857  | PEF     | GGCCAGTGGATGGTACAAGTT       |                           |
| rs2227857  | PER     | GTAGTACTCACCTTCTTCTTGGTTAAG |                           |
| rs2228945  | F- cDNA | CTGATGACCAAACACCCAGCC       | 30s,30s,20s (95,59,72) ×  |
| rs2228945  | R- cDNA | CTTTGGGCTTGAATGGTGG         | 30                        |
| rs2228945  | PEF     | GGGAGAGGGACGTGAGAGA         |                           |
| rs2228945  | PER     | ATCCTCCGGAAGAAGGCATG        |                           |
| 15×GCC     | F-FAM   | CCCGCATCCCCACTCG            | 30s,30s,30s(95,61,decreas |
| 15×GCC     | R       | GCGCTCGCGCTTCCTACTC         | e1/cycle,72)×8,30s,30s,30 |
|            |         |                             | s(95,53,72) ×28           |
| rs35476409 | F-FAM   | TTCTCCCCTGTATTGCTAGTCTG     | 30s,30s,30s (95,60,72) ×  |
| rs35476409 | R       | CCAAACTCCCTTCACATCCA        | 35                        |

Table S2. Primers and cloning sites used in reporter plasmid cloning reactions.

| SNPs                | F/R | Primer Sequence (5' to 3')                     | Cloning sites |
|---------------------|-----|------------------------------------------------|---------------|
| rs9910355/rs9303504 | F   | TTTCTCTATCGATAGGTACCATCACGCCACTGTACTCCAGC      | KpnI          |
| rs9910355/rs9303504 | R   | ACGCGTAAGAGCTCGGTACCGAACACACTGGAAATACAACAGAAGC |               |
| rs9909004           | F   | CTAGCCCGGGCTCGAGTGAAAAGTATACCAGGGCAAG          | XhoI          |
| rs9909004           | R   | GATCGCAGATCTCGAGCCCCTCAAATCCAGTGACG            |               |
| rs12601850          | F   | TTTCTCTATCGATAGGTACC GGGTTTGGGAAACAAGGCTTC     | KpnI          |
| rs12601850          | R   | ACGCGTAAGAGCTCGGTACCGCCAGATGGGAAATGGAACC       |               |
| rs17633437          | F   | TTTCTCTATCGATAGGTACCGGCATATGAAGCGACTGTGCTC     | KpnI          |
| rs17633437          | R   | ACGCGTAAGAGCTCGGTACCCTTGGGGGGAAAAAATCTTG       |               |
| rs7210446           | F   | CTAGCCCGGGCTCGAGAACCATGACCAACAGGAGCC           | XhoI          |
| rs7210446           | R   | GATCGCAGATCTCGAGTCCAAAGTGCTGGGATGACA           |               |

Table S3. Chromatin state and histone marks for candidate SNPs in heart and other tissues.

| SNP        | Chromatin state (core 15 state model) as enhancer | Active enhancer mark (H3K4me1+H3K29ac)          | Poised enhancer mark (H3K4me1 only)                  |
|------------|---------------------------------------------------|-------------------------------------------------|------------------------------------------------------|
| rs9910355  | heart tissues, IMR90 cell and T-cells             | other 5 tissues/cells, not in heart             | left ventricle and other 7 tissues/cells             |
| rs9303504  | heart tissues, IMR90 cell and T-cells             | other 5 tissues/cells, not in heart             | left ventricle and other 9 tissues/cells             |
| rs9909004  | most of the tissues/cells studied, not in heart   | most of the tissues/cells studied, not in heart | left ventricle and most of the tissues/cells studied |
| rs12601850 | most of the tissues/cells studied, not in heart   | most of the tissues/cells studied, not in heart | most of the tissues/cells studied, not in heart      |
| rs17633437 | most of the tissues/cells studied, not in heart   | most of the tissues/cells studied, not in heart | most of the tissues/cells studied, not in heart      |
| rs7210446  | most of the tissues/cells studied, not in heart   | most of the tissues/cells studied, not in heart | most of the tissues/cells studied, right ventricle   |
| rs9910577  | other 7 tissues/cells, not in heart               | other 6 tissues/cells, not in heart             | other 9 tissues/cells, not in heart                  |
| rs9890911  | T-cells                                           | T-cells, not in heart                           | left ventricle and other 9 tissues/cells             |
| rs9912468  | none                                              | other 3 tissues/cells, not in heart             | other 5 tissues/cells, not in heart                  |
| rs11867573 | other 3 tissues/cells, not in heart               | other 3 tissues/cells, not in heart             | other 11 tissues/cells, not in heart                 |
| rs8071250  | T-cells                                           | other 4 tissues/cells, not in heart             | other 10 tissues/cells, not in heart                 |
| rs9892651  | other 4 tissues/cells, not in heart               | other 11 tissues/cells, not in heart            | other 14 tissues/cells, not in heart                 |
| rs11079650 | T-cells and Colon                                 | other 4 tissues/cells, not in heart             | other 9 tissues/cells, not in heart                  |

---

|            |                                      |                                     |                                                 |
|------------|--------------------------------------|-------------------------------------|-------------------------------------------------|
| rs4577128  | other 4 tissues/cells, not in heart  | other 2 tissues/cells, not in heart | most of the tissues/cells studied, not in heart |
| rs9893075  | T-cells                              | other 5 tissues/cells, not in heart | other 6 tissues/cells, not in heart             |
| rs11658550 | T-cells                              | other 4 tissues/cells, not in heart | other 7 tissues/cells, not in heart             |
| rs11658630 | T-cells                              | other 5 tissues/cells, not in heart | other 6 tissues/cells, not in heart             |
| rs12940610 | T-cells                              | other 4 tissues/cells, not in heart | most of the tissues/cells studied, not in heart |
| rs4335805  | T-cells                              | T-cells                             | most of the tissues/cells studied, not in heart |
| rs4328478  | T-cells and fetal Kidney             | T-cells                             | most of the tissues/cells studied, not in heart |
| rs7406054  | T-cells                              | other 5 tissues/cells, not in heart | other 7 tissues/cells, not in heart             |
| rs7406066  | T-cells                              | other 4 tissues/cells, not in heart | other 8 tissues/cells, not in heart             |
| rs35183571 | other 10 tissues/cells, not in heart | other 8 tissues/cells, not in heart | most of the tissues/cells studied, not in heart |
| rs12944131 | other 4 tissues/cells, not in heart  | other 3 tissues/cells, not in heart | most of the tissues/cells studied, not in heart |

---

Data are from Haploreg v4.1.
